# Supplementary material
Source: PubMed Central journal article supplement (PMC6645536)
Supplement: ao8b01272_si_001.pdf [file ao8b01272_si_001.pdf]

## Supplementary material

### Low-energy encapsulation of $\alpha$ -Tocopherol using fully food grade oil-in-water (O/W) microemulsions

M. Ali Aboudzadeh<sup>a</sup>, Ehsan Mehravar<sup>a</sup>, Mercedes Fernandez<sup>a</sup>, Luis Lezama<sup>b</sup> and Radmila Tomovska<sup>a,c\*</sup>

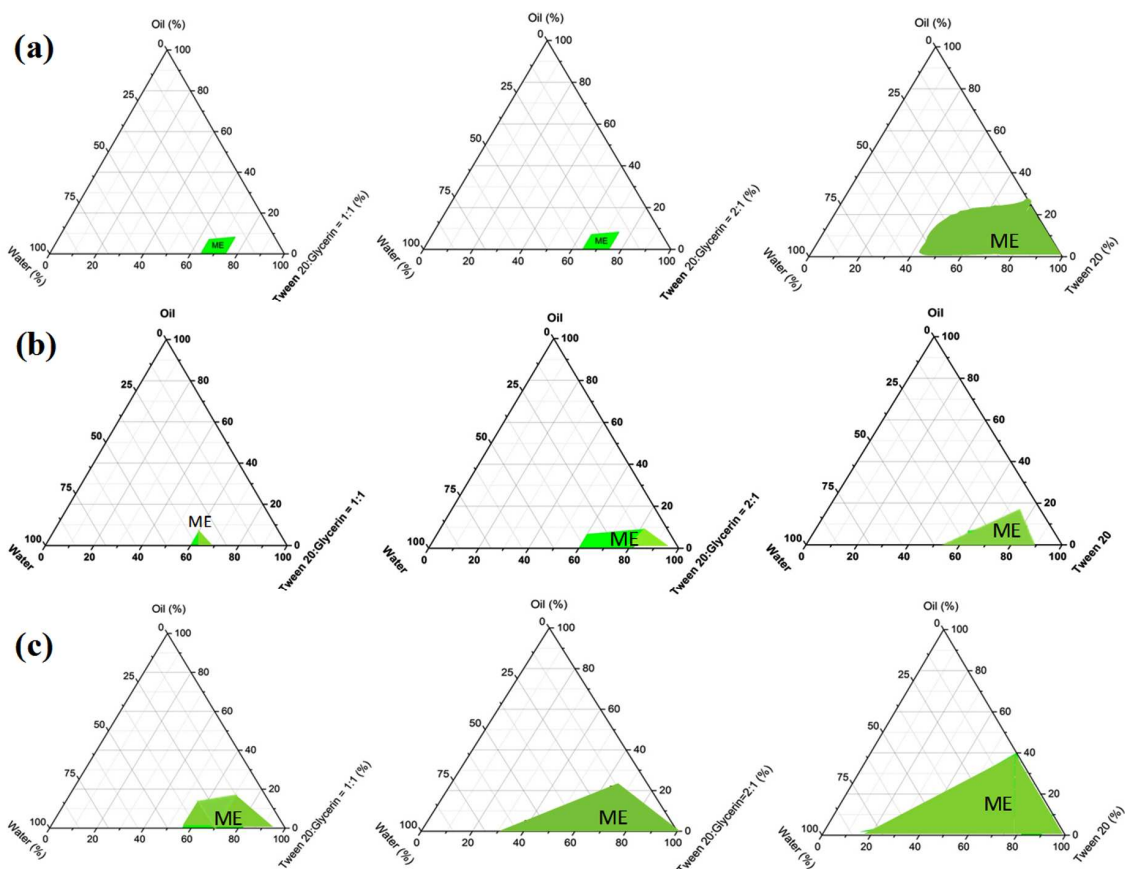

**Figure S1.** Pseudoternary phase behaviors of the systems consist of oil/(surfactants and cosurfactant) /water at 25 °C. Type of the oil is (a) IPM (b) lemon oil and (c) IAAC. The ratio of surfactant to cosurfactant changes from left to right as 1 : 1, 2 : 1 and 1 : 0, respectively. The microemulsion region is labeled in green as ME.

| Component        | wt%  |      |      |      |       |       |       |      |
|------------------|------|------|------|------|-------|-------|-------|------|
| Tween 20         | 40.5 | 37.5 | 30   | 25   | 19.5  | 15.5  | 11.25 | 7.5  |
| Glycerol         | 40.5 | 37.5 | 30   | 25   | 19.5  | 15.5  | 11.25 | 7.5  |
| Oil + $\alpha$ T | 9    | 8.5  | 6.5  | 5.5  | 4.35  | 3.65  | 2.65  | 1.9  |
| Water            | 10   | 16.5 | 33.5 | 44.5 | 56.65 | 65.35 | 74.85 | 83.1 |

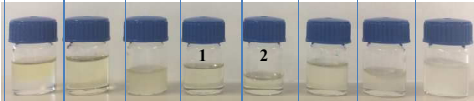

ME111

| Component        | wt% |      |      |       |       |       |     |       |
|------------------|-----|------|------|-------|-------|-------|-----|-------|
| Tween 20         | 54  | 50   | 40   | 33.33 | 26    | 20.6  | 15  | 10    |
| Glycerol         | 27  | 25   | 20   | 16.67 | 13    | 10.3  | 7.5 | 5     |
| Oil + $\alpha$ T | 10  | 8.5  | 6.7  | 5.55  | 4.35  | 3.45  | 2.5 | 1.75  |
| Water            | 9   | 16.5 | 33.3 | 44.45 | 56.55 | 65.65 | 75  | 83.25 |

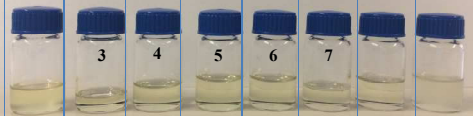

ME121

| Component        | wt% |      |      |       |      |      |       |      |
|------------------|-----|------|------|-------|------|------|-------|------|
| Tween 20         | 81  | 72.5 | 60   | 50    | 39   | 31   | 21    | 15   |
| Glycerol         | 0   | 0    | 0    | 0     | 0    | 0    | 0     | 0    |
| Oil + $\alpha$ T | 10  | 8    | 6.6  | 5.55  | 4.5  | 3.5  | 2.35  | 1.7  |
| Water            | 9   | 19.5 | 33.4 | 44.45 | 56.5 | 65.5 | 76.65 | 83.3 |

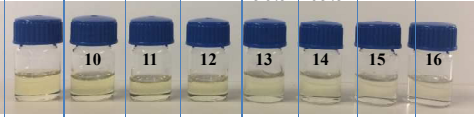

ME110

| Component        | wt%  |      |      |      |       |       |      |      |
|------------------|------|------|------|------|-------|-------|------|------|
| Tween 20         | 37.5 | 34   | 28   | 23.5 | 18.75 | 15    | 11   | 7.5  |
| Glycerol         | 37.5 | 34   | 28   | 23.5 | 18.75 | 15    | 11   | 7.5  |
| Oil + $\alpha$ T | 16.5 | 15.5 | 13.5 | 10.5 | 8.35  | 6.65  | 4.9  | 3.3  |
| Water            | 8.5  | 16.5 | 30.5 | 42.5 | 54.15 | 63.35 | 73.1 | 81.7 |



ME211

| Component        | wt%  |      |       |       |       |       |      |      |
|------------------|------|------|-------|-------|-------|-------|------|------|
| Tween 20         | 50   | 46   | 37.5  | 31.4  | 25    | 20    | 15   | 10   |
| Glycerol         | 25   | 23   | 18.75 | 15.7  | 12.5  | 10    | 7.5  | 5    |
| Oil + $\alpha$ T | 16.5 | 15.5 | 12.5  | 11.15 | 8.35  | 6.65  | 5    | 3.3  |
| Water            | 8.5  | 15.5 | 31.25 | 41.75 | 54.15 | 63.35 | 72.5 | 81.7 |

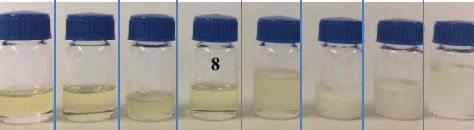

ME221

| Component        | wt%  |      |    |    |      |      |    |      |
|------------------|------|------|----|----|------|------|----|------|
| Tween 20         | 75   | 69.5 | 56 | 47 | 37.5 | 30   | 22 | 15   |
| Glycerol         | 0    | 0    | 0  | 0  | 0    | 0    | 0  | 0    |
| Oil + $\alpha$ T | 16.5 | 15   | 13 | 11 | 8.5  | 6.5  | 5  | 3.4  |
| Water            | 8.5  | 15.5 | 31 | 42 | 54   | 63.5 | 73 | 81.6 |

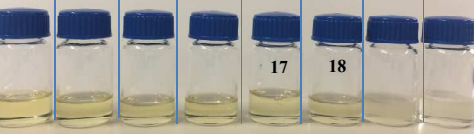

ME210

**Figure S2.** Visual appearance and composition of all  $\alpha$ Toc holder samples prepared in this study, the obtained stable ME samples are marked with same numbers as indicated in

Table S1.

**Table S1.** Composition of stable  $\alpha$ Toc -ME formulations and the droplet size & polydispersity index (PDI)

| Class | No. | Oil phase (%) | Tween 20 (%) | Glycerol (%) | Water (%) | Blank particle size <sup>a</sup> (nm) | Blank PDI     | Particle size <sup>a</sup> (nm) | PDI           |
|-------|-----|---------------|--------------|--------------|-----------|---------------------------------------|---------------|---------------------------------|---------------|
| ME111 | 1   | 5.55          | 25           | 25           | 44.45     | 9.05 ± 0.23                           | 0.246 ± 0.018 | 18.83 ± 0.60                    | 0.12 ± 0.030  |
|       | 2   | 4.35          | 19.5         | 19.5         | 56.65     | 10.17 ± 0.01                          | 0.251 ± 0.003 | 19.21 ± 0.29                    | 0.197 ± 0.026 |
| ME121 | 3   | 8.5           | 50           | 25           | 16.5      | 9.39 ± 0.98                           | 0.214 ± 0.036 | 10.39 ± 0.12                    | 0.209 ± 0.011 |
|       | 4   | 6.70          | 40           | 20           | 33.30     | 8.27 ± 0.37                           | 0.167 ± 0.047 | 9.91 ± 0.14                     | 0.1 ± 0.007   |
|       | 5   | 5.55          | 33.33        | 16.67        | 44.45     | 8.04 ± 0.17                           | 0.114 ± 0.021 | 11.11 ± 0.42                    | 0.214 ± 0.010 |
|       | 6   | 4.35          | 26           | 13           | 56.55     | 8.70 ± 0.34                           | 0.192 ± 0.005 | 10.08 ± 0.12                    | 0.115 ± 0.008 |
|       | 7   | 3.45          | 20.60        | 10.30        | 65.65     | 8.12 ± 0.20                           | 0.175 ± 0.014 | 11.24 ± 0.49                    | 0.243 ± 0.015 |
| ME221 | 8   | 11.15         | 31.4         | 15.7         | 41.75     | 7.98 ± 0.10                           | 0.105 ± 0.022 | 13.47 ± 0.70                    | 0.175 ± 0.021 |
|       | 10  | 8             | 72.5         | 0            | 19.5      | 8.12 ± 0.09                           | 0.135 ± 0.017 | 8.84 ± 0.04                     | 0.157 ± 0.016 |
|       | 11  | 6.60          | 60           | 0            | 33.40     | 7.76 ± 0.10                           | 0.122 ± 0.017 | 8.38 ± 0.20                     | 0.105 ± 0.010 |
|       | 12  | 5.55          | 50           | 0            | 44.45     | 7.99 ± 0.30                           | 0.111 ± 0.060 | 9.25 ± 0.52                     | 0.096 ± 0.058 |
|       | 13  | 4.5           | 39           | 0            | 56.50     | 7.76 ± 0.06                           | 0.075 ± 0.002 | 8.88 ± 0.52                     | 0.135 ± 0.058 |
|       | 14  | 3.50          | 31           | 0            | 65.50     | 7.53 ± 0.16                           | 0.095 ± 0.025 | 9.02 ± 0.11                     | 0.178 ± 0.028 |
|       | 15  | 2.35          | 21           | 0            | 76.65     | 8.05 ± 0.24                           | 0.167 ± 0.012 | 9.86 ± 0.04                     | 0.217 ± 0.022 |
|       | 16  | 1.70          | 15           | 0            | 83.30     | 8.61 ± 0.05                           | 0.208 ± 0.006 | 10.26 ± 0.93                    | 0.231 ± 0.054 |
| ME210 | 17  | 8.35          | 37.5         | 0            | 54.15     | 8.29 ± 0.01                           | 0.09 ± 0.004  | 11.15 ± 0.05                    | 0.173 ± 0.005 |
|       | 18  | 6.65          | 30           | 0            | 63.35     | 9.51 ± 0.20                           | 0.257 ± 0.007 | 11.09 ± 0.16                    | 0.201 ± 0.018 |

<sup>a</sup> Z-average, all the values reported here are the mean of three measurements

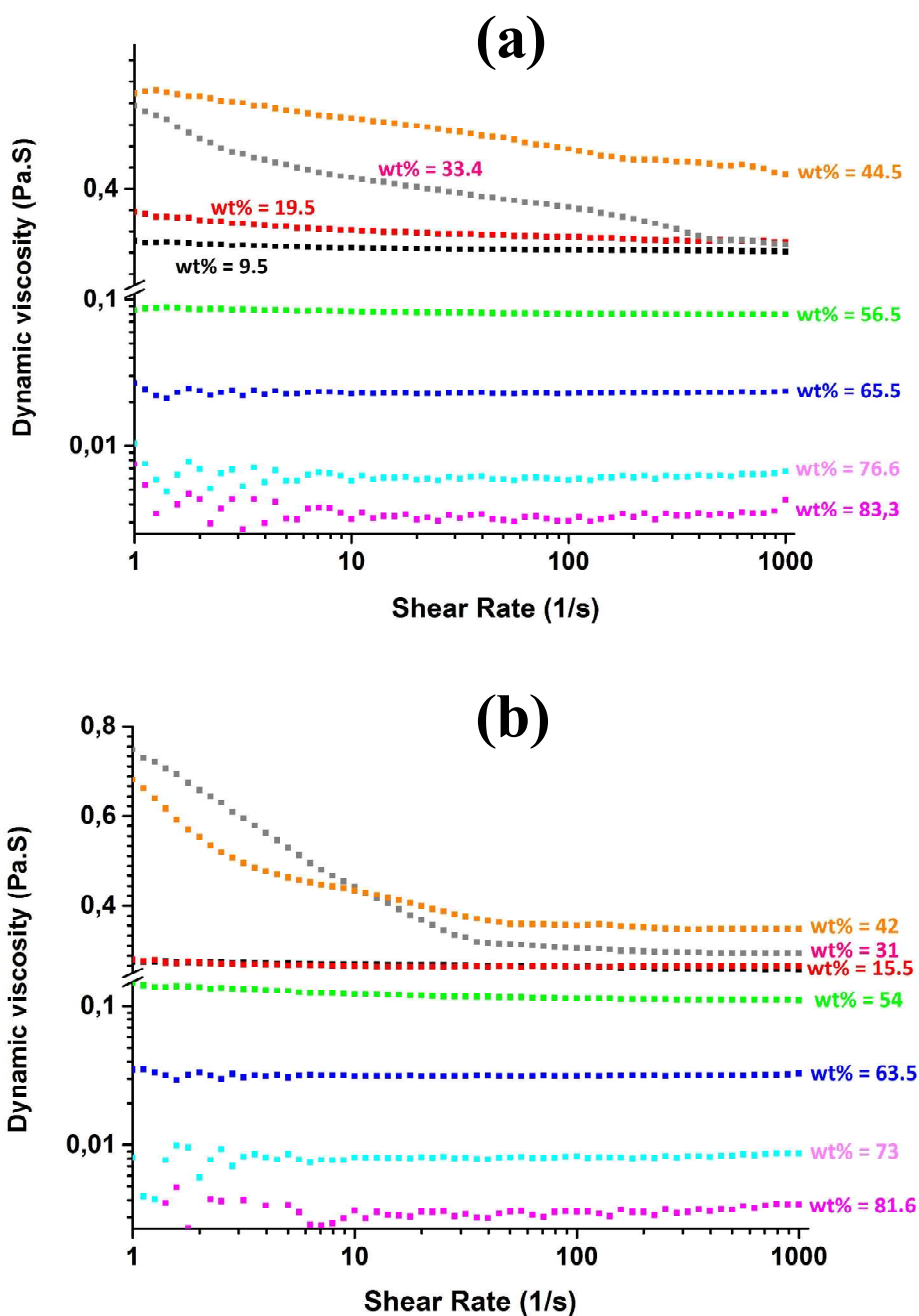

**Figure S3.** As an example, the rheological behavior of cosurfactant-free system: a) ME110 and b) ME210 were examined by plotting the shear stress ( $\sigma$ ) versus the shear rate ( $\dot{\gamma}$ ) values. Water content (wt%) of each sample was written close to its rheological curve.

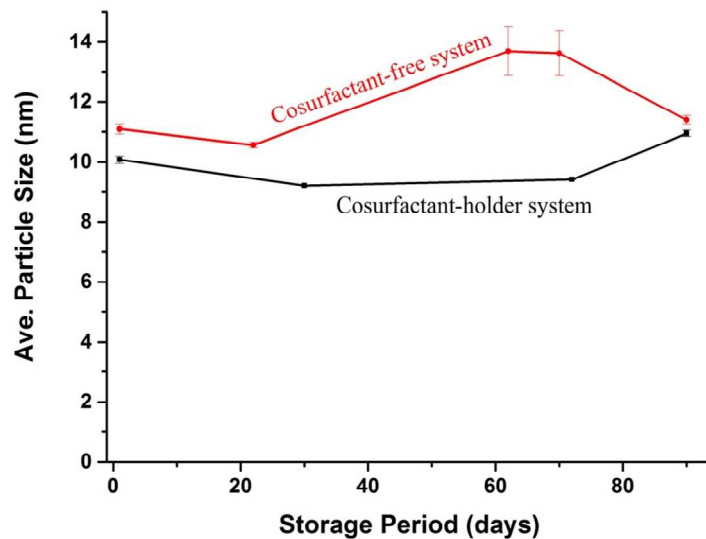

**Figure S4.** Stability data: variation of average particle size for cosurfactant-holder sample (black line) and a cosurfactant-free system (red line) at room temperature over a storage time of 3 months.

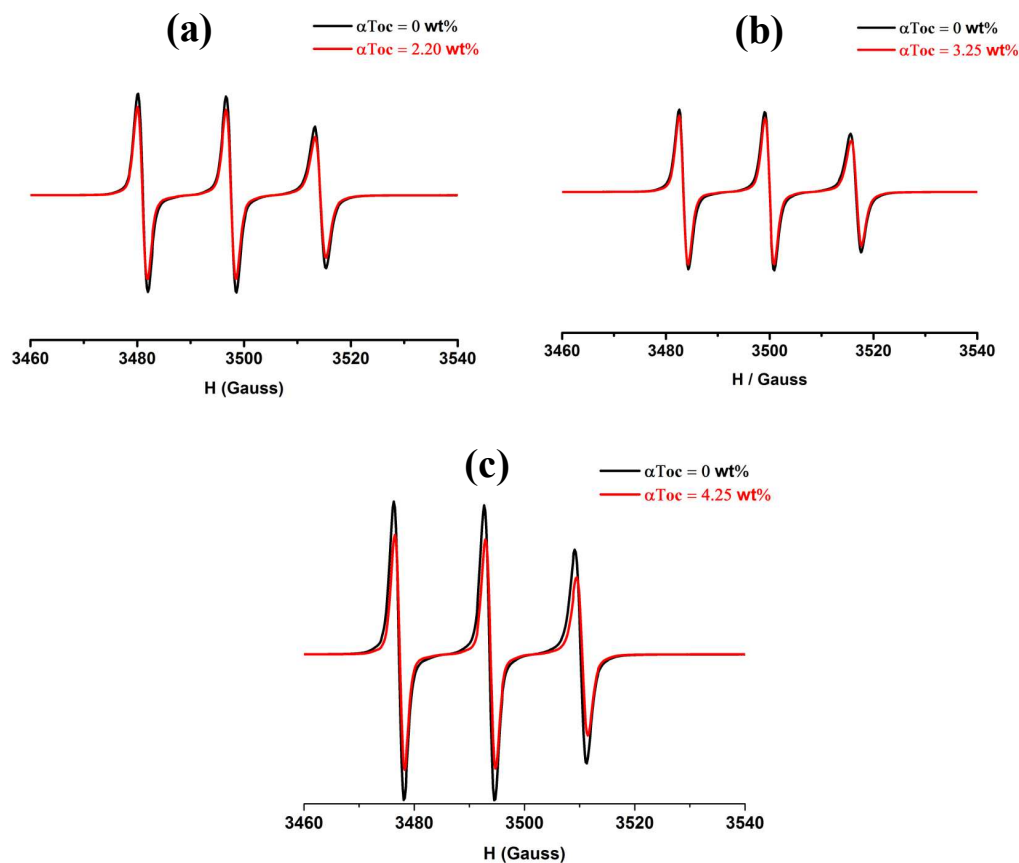

**Figure S5.** Corresponding EPR spectra in absence and presence of cosurfactant at different  $\alpha$ -Toc concentration
